# Supplementary material for: C–H Bond activation and C–C bond formation in the reaction of 2,5-dimethylthiophene with TpMe2Ir compounds
Source: Royal Society of Chemistry journal article supplement (doi:10.1039/b419414d), 2005-01-01
Supplement: b419414d.pdf [file b419414d.pdf]

## C-H bond activation and C—C bond formation in the reaction of 2,5-dimethylthiophene with $\text{Tp}^{\text{Me}_2}$ compounds

Margarita Paneque,<sup>\*a</sup> Manuel L. Poveda,<sup>a</sup> Ernesto Carmona,<sup>a</sup> and Verónica Salazar<sup>b</sup>

<sup>a</sup> *Instituto de Investigaciones Químicas-Departamento de Química Inorgánica, Consejo Superior de Investigaciones Científicas-Universidad de Sevilla, Avda. Américo Vespucio 49, Isla de la Cartuja, 41092 Sevilla, Spain. Fax: 34 954 460565; Tel: 34 954 489557; E-mail: paneque@iiq.csic.es*

<sup>b</sup> *Centro de Investigaciones Químicas, Universidad Autónoma del Estado de Hidalgo, Carretera de Pachuca a Tulancingo Km 4.5, Pachuca, Hidalgo, México.*

### Compound 6b

Compound 4 (0.10 g, 0.15 mmol) was dissolved in cyclohexane (5 mL) and  $\text{PMe}_3$  (0.38 mL, 1 M solution in THF, 0.38 mmol) was added. The solution was stirred for 3 h at 90 °C. After this period of time, the solvent was evaporated under reduced pressure, pentane (5 mL) was added, and the mixture stirred vigorously for a few minutes. The pale brown solid thus formed was separated by filtration and dissolved in  $\text{Et}_2\text{O}$  (10 mL). Cooling this solution to -20 °C yielded pure compound **6b** (0.09 g, 80%).  $^1\text{H}$  NMR ( $\text{C}_6\text{D}_6$ , 25 °C):  $\delta$  6.46 (s, 1 H,  $\text{CH}_{\text{th}}$ ), 5.62, 5.59, 5.50 (s, 1 H each, 3  $\text{CH}_{\text{pz}}$ ), 3.81, 3.66 (dd, d, 1 H each,  $^2J_{\text{AB}} = 15.8$ ,  $^3J_{\text{HP}} = 5.0$  Hz,  $\text{IrCH}_2\text{C}_q$ ), 2.95 (m, 2 H,  $\text{IrCH}_2\text{CH}_2$ ), 2.94, 2.63 (m, 1 H each,  $\text{IrCH}_2\text{CH}_2$ ), 2.44, 2.32, 2.30, 2.27, 2.08, 1.39, (s, 3 H each, 6  $\text{Me}_{\text{pz}}$ ), 2.18 (s, 3 H,  $\text{Me}_{\text{th}}$ ), 1.20 (d, 9 H,  $^2J_{\text{HP}} = 10.0$  Hz,  $\text{PMe}_3$ ).  $^{13}\text{C}\{^1\text{H}\}$  NMR ( $\text{CDCl}_3$ , 25 °C):  $\delta$  149.5, 149.2, 148.9, 143.4, 143.1, 142.5 (d, s, s, s, s, d,  $J_{\text{CP}} = 3$  and 2 Hz,  $\text{C}_{\text{qpz}}$ ), 140.7, 139.4, 132.8 ( $\text{C}_{\text{qth}}$ ), 127.9 ( $\text{CH}_{\text{th}}$ ), 108.2, 108.1, 108.0 (d, s, s,  $J_{\text{CP}} = 4$  Hz,  $\text{CH}_{\text{pz}}$ ), 28.3 ( $\text{IrCH}_2\text{CH}_2$ ), 17.4 (d,  $^1J_{\text{CP}} = 36$  Hz,  $\text{PMe}_3$ ), 16.2, 15.9, 12.3, 13.7, 13.4, 13.3, 13.0 ( $\text{Me}_{\text{pz}}$  and  $\text{Me}_{\text{th}}$ ) -16.1, -16.2 (d,  $^2J_{\text{CP}} = 8$ ,  $\text{IrCH}_2$ ,  $^1J_{\text{CH}} = 126$  Hz).  $^{31}\text{P}\{^1\text{H}\}$  NMR ( $\text{C}_6\text{D}_6$ , 25 °C):  $\delta$  -52.2. Anal. Calcd for  $\text{C}_{26}\text{H}_{41}\text{BN}_6\text{PSIr}$ : C, 44.3; H, 5.8; N, 11.9. Found: C, 43.9; H, 5.9; N, 11.4.

### Compound 6c

Compound **4** (0.10 g, 0.16 mmol) was dissolved in cyclohexane (15 mL) and transferred to a Fischer-Porter vessel. The solution was subjected to 3 atm of CO and heated at 100 °C for 3 h. The solvent was evaporated under vacuo and the pale brown residue washed with pentane and dried in vacuo. Compound **6c** was thus isolated in almost quantitative yield. IR (Nujol):  $\nu(\text{CO})$  2005  $\text{cm}^{-1}$ .  $^1\text{H}$  NMR ( $\text{C}_6\text{D}_6$ , 25 °C):  $\delta$  6.51 (s, 1 H,  $\text{CH}_{\text{th}}$ ), 5.50, 5.42, 5.38 (s, 1 H each, 3  $\text{CH}_{\text{pz}}$ ), 4.13, 3.50 (d, 1 H each,  $^2J_{\text{AB}} = 15.5$  Hz,  $\text{IrCH}_2\text{C}_q$ ), 3.30, 3.07, 2.93, 2.57 (m, 1 H each,  $\text{IrCH}_2\text{CH}_2$ ), 2.39, 2.36, 2.30, 2.29, 2.07, 2.05, 1.99 (s, 3 H each, 6  $\text{Me}_{\text{pz}}$  and  $\text{Me}_{\text{th}}$ ).  $^{13}\text{C}\{^1\text{H}\}$  NMR ( $\text{C}_6\text{D}_6$ , 25 °C):  $\delta$  169.6 (CO), 151.1, 150.0, 149.5, 143.1, 142.9, 142.8 ( $\text{C}_{\text{qpz}}$ ), 140.2, 138.7, 133.6 ( $\text{C}_{\text{qth}}$ ), 128.2 ( $\text{CH}_{\text{th}}$ ), 108.8, 107.1 (1:2,  $\text{CH}_{\text{pz}}$ ), 31.5 ( $\text{IrCH}_2\text{CH}_2$ ), 14.9, 14.1, 13.8, 13.7, 12.3, 12.1, 12.0 ( $\text{Me}_{\text{pz}}$  and  $\text{Me}_{\text{th}}$ ), -4.2, -9.8 ( $\text{IrCH}_2$ ). Anal. Calcd for  $\text{C}_{24}\text{H}_{232}\text{BN}_6\text{OSIr}$ : C, 43.9; H, 4.8; N, 12.8. Found: C, 44.5; H, 4.9; N, 12.7.

### Compound 6d

Compound **4** (0.10 g, 0.16 mmol) was dissolved in cyclohexane (5 mL) and  $\text{CNBu}^t$  was added (1.60 mL of a solution 0.1 M in cyclohexane, 0.16 mmol). The solution was stirred for 3 h at 90 °C. After this period of time, the solvent was evaporated under reduced pressure, pentane (5 mL) added, and the mixture stirred vigorously for a few minutes. The white solid formed was separated by filtration, dissolved in  $\text{Et}_2\text{O}$  (5 mL), and the solution cooled to -20 °C, to yield compound **6d** (0.09 g, 80%). IR (Nujol):  $\nu(\text{CN})$  2126  $\text{cm}^{-1}$ .  $^1\text{H}$  NMR ( $\text{C}_6\text{D}_6$ , 25 °C):  $\delta$  6.54 (s, 1 H,  $\text{CH}_{\text{th}}$ ), 5.67, 5.58, 5.48 (s, 1 H each, 3  $\text{CH}_{\text{pz}}$ ), 3.97, 3.64 (d, 1 H each,  $^2J_{\text{AB}} = 15.9$  Hz,  $\text{IrCH}_2\text{C}_q$ ), 3.13, 2.90, 2.80, 2.75 (m, 1 H each,  $\text{IrCH}_2\text{CH}_2$ ), 2.52, 2.50, 2.46, 2.33, 2.16, 2.14, 2.09 (s, 3 H each, 6  $\text{Me}_{\text{pz}}$  and  $\text{Me}_{\text{th}}$ ), 0.95 (s, 9 H,  $\text{CMe}_3$ ).  $^{13}\text{C}\{^1\text{H}\}$  NMR ( $\text{C}_6\text{D}_6$ , 25 °C):  $\delta$  150.5, 149.5, 149.1, 142.5, 142.4, 142.3 ( $\text{C}_{\text{qpz}}$ ), 141.2, 140.1, 132.4 ( $\text{C}_{\text{qth}}$ ), 128.1 ( $\text{CH}_{\text{th}}$ ), 108.4, 106.6, 106.6 ( $\text{CH}_{\text{pz}}$ ), 56.0 ( $\text{CMe}_3$ ), 31.6 ( $\text{IrCH}_2\text{CH}_2$ ), 29.8 ( $\text{CMe}_3$ ), 15.2, 14.5, 14.2, 14.0, 12.5, 12.3, 12.2 ( $\text{Me}_{\text{pz}}$  and  $\text{Me}_{\text{th}}$ ), -9.6, -12.9 ( $\text{IrCH}_2$ ). Anal. Calcd for  $\text{C}_{28}\text{H}_{41}\text{BN}_7\text{SIr}\cdot 0.5\text{Et}_2\text{O}$ : C, 48.1; H, 6.1; N, 13.1. Found: C, 48.3; H, 6.0; N, 13.0.

### Reaction of compound 4 with thiophene

Compound 4 was heated in neat thiophene for 6 h, at 60 °C. <sup>1</sup>H NMR analysis of the crude of the reaction reveals formation of the known compound Tp<sup>Me2</sup>Ir(2-SC<sub>4</sub>H<sub>3</sub>)<sub>2</sub>(SC<sub>4</sub>H<sub>4</sub>) together with 2,5-dimethyl-3-ethylthiophene. Albeit not isolated, this product is characterized, among others, by a single resonance at 6.47 ppm, in the <sup>1</sup>H NMR spectrum.

### Compound 7

Solid samples of compound 3 (0.02 g, 0.036 mmol) and the acid [H(OEt<sub>2</sub>)<sub>2</sub>][(3,5-(F<sub>3</sub>C)<sub>2</sub>C<sub>6</sub>H<sub>3</sub>)<sub>4</sub>B] (0.037 g, 0.036 mmol) were mixed, degassed and dissolved into CH<sub>2</sub>Cl<sub>2</sub> (8 mL) cooled at -70 °C, a brown solution being formed. After 10 min the mixture was slowly warmed to room temperature, and after 15 min stirring under these conditions, the solvent was evaporated in vacuo, petroleum ether was added (10 mL), and the suspension stirred vigorously. Compound 7 was isolated as a brown powder (0.05 g, 95%). IR (Nujol): ν(IrH) 2181 cm<sup>-1</sup>. <sup>1</sup>H NMR (CDCl<sub>3</sub>, 25 °C): δ 6.78, 6.63 (d, 2 H each, <sup>3</sup>J<sub>HH</sub> = 1.9 Hz, 4 CH<sub>th</sub>), 6.01, 5.68 (s, 2:1, 3 CH<sub>pz</sub>), 2.56, 1.03 (s, 6 H each, 4 Me<sub>th</sub>), 2.49, 2.37, 2.33, 1.58 (s, 1:1:2:2, 6 Me<sub>pz</sub>), -19.80 (s, 1 H, IrH). <sup>13</sup>C{<sup>1</sup>H} NMR (CDCl<sub>3</sub>, 25 °C): δ 153.6, 153.1, 146.5, 146.3 (1:2:2:1, C<sub>qpz</sub>), 143.9, 143.8 (C<sub>qth</sub>), 130.7, 130.6 (CH<sub>th</sub>), 108.6, 107.3 (1:2, CH<sub>pz</sub>), 16.4 (Me<sub>th</sub>), 14.1, 13.9, 13.5, 13.1, 12.6, 12.2 (1:2:2:2:1, Me<sub>pz</sub> and Me<sub>th</sub>). Anal. Calcd for C<sub>59</sub>H<sub>51</sub>B<sub>2</sub>N<sub>6</sub>F<sub>24</sub>S<sub>2</sub>Ir: C, 44.8; H, 3.2; N, 5.3. Found: C, 44.7; H, 3.3; N, 5.9.

### Compound 8

A mixture of solid samples of Tp<sup>Me2</sup>Ir(H)(2-SC<sub>4</sub>H<sub>3</sub>)(NCMe) (0.02 g, 0.033 mmol) and the acid [H(OEt<sub>2</sub>)<sub>2</sub>][(3,5-(F<sub>3</sub>C)<sub>2</sub>C<sub>6</sub>H<sub>3</sub>)<sub>4</sub>B] (0.033 g, 0.035 mmol) was dissolved in a mixture of Et<sub>2</sub>O:MeOH (10 mL, 1:1) at -70 °C, a brown solution being formed. After 15 min at low temperature, the mixture was warmed to room temperature and stirred for 24 h. The solvent was then evaporated under vacuum, petroleum ether (10 mL) was added and the suspension was cooled again to -70 °C to provide compound 8 as a greenish solid (0.046 g, 95%). IR (Nujol): ν(IrH) 2169 cm<sup>-1</sup>. <sup>1</sup>H NMR (CDCl<sub>3</sub>, 25 °C): δ 7.44,

7.34 (d, 2 H each,  $^3J_{\text{HH}} = 3.9$  Hz, 4  $\text{CH}_{\text{th}}$ ), 6.00, 5.90, 5.82 (s, 1 H each, 3  $\text{CH}_{\text{pz}}$ ), 2.63, 2.49, 2.42, 2.38, 2.27 (s, 2:1:1:1:1, 6  $\text{Me}_{\text{pz}}$ ), 2.01 (s, 3 H,  $\text{NCMe}$ ), -19.63 (s, 1 H,  $\text{IrH}$ ).  $^{13}\text{C}\{^1\text{H}\}$  NMR ( $\text{CDCl}_3$ , 25 °C):  $\delta$  153.1, 151.3, 150.6, 146.2, 145.6, 145.5 ( $\text{C}_{\text{qpz}}$ ), 134.0, 132.0 ( $\text{CH}_{\text{th}}$ ), 119.3 ( $\text{NCMe}$ ), 107.7, 107.3, 107.1 ( $\text{CH}_{\text{pz}}$ ), 14.7, 14.7, 13.4, 12.7, 12.5, 12.1 ( $\text{Me}_{\text{pz}}$ ), 3.0 ( $\text{NCMe}$ ). Anal. Calcd for  $\text{C}_{53}\text{H}_{42}\text{B}_2\text{N}_7\text{F}_{24}\text{SIr}$ : C, 43.0; H, 2.8; N, 6.6. Found: C, 43.4; H, 3.2; N, 6.2.

### Compound 15

Compound **5** (0.017 g, 0.023 mmol) and the acid  $[\text{H}(\text{OEt}_2)_2][(\text{3,5-(F}_3\text{C)}_2\text{C}_6\text{H}_3)_4\text{B}]$  (0.025 g, 0.023 mmol) were mixed and dissolved in acetonitrile (8 mL) cooled to -50 °C. After 10 min stirring the temperature was slowly raised to 25 °C and the solution stirred for 20 further minutes. The solvent was then evaporated under reduced pressure, petroleum ether added (10 mL) and the mixture stirred vigorously at -70 °C to yield a brown powder of compound **15** in almost quantitative yield. IR (Nujol):  $\nu(\text{IrH})$  2171  $\text{cm}^{-1}$ .  $^1\text{H}$  NMR ( $\text{CDCl}_3$ , 25 °C):  $\delta$  6.74, 6.36 (s, 1 H each, 2  $\text{CH}_{\text{th}}$ ), 5.92, 5.81, 5.69 (s, 1 H each, 3  $\text{CH}_{\text{pz}}$ ), 4.13, 3.37 (d, 1 H each,  $^2J_{\text{HH}} = 13$  Hz,  $\text{CH}_2$ ), 2.50, 2.20 (m, 1 H each,  $\text{CH}_2\text{Me}$ ), 2.44, 2.43, 2.35, 2.32, 2.20, 2.18, 1.53 (s, 1:1:2:3:1:1:1, 6  $\text{Me}_{\text{pz}}$ ,  $\text{NCMe}$  and 3  $\text{Me}_{\text{th}}$ ), 1.09 (t, 3 H,  $^3J_{\text{HH}} = 7.6$  Hz,  $\text{CH}_2\text{Me}$ ), -19.83 (s, 1 H,  $\text{IrH}$ ).  $^{13}\text{C}\{^1\text{H}\}$  NMR ( $\text{CDCl}_3$ , 25 °C):  $\delta$  153.0, 151.3, 150.2, 146.0, 145.6, 145.4 ( $\text{C}_{\text{qpz}}$ ), 145.7, 142.3, 138.3, 136.0, 134.0, 130.7 ( $\text{C}_{\text{qth}}$ ), 132.8, 126.2 ( $\text{CH}_{\text{th}}$ ), 119.1 ( $\text{NCMe}$ ), 107.8, 107.0, 107.0 ( $\text{CH}_{\text{pz}}$ ), 25.2 ( $\text{CH}_2\text{Me}$ ), 22.8 ( $\text{CH}_2$ ), 15.0, 14.7, 13.8, 13.5, 13.3, 13.0, 12.6, 12.5, 12.1 ( $\text{Me}_{\text{pz}}$ ,  $\text{Me}_{\text{th}}$  and  $\text{CH}_2\text{Me}$ ), 2.9 ( $\text{NCMe}$ ). Anal. Calc for:  $\text{C}_{63}\text{H}_{42}\text{B}_2\text{N}_7\text{F}_{24}\text{S}_2\text{Ir}$ : C, 46.1; H, 2.6; N, 5.9. Found: C, 46.7; H, 3.1; N, 5.6.

### Isolation of the dithienyl derivative

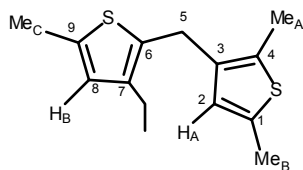

Compound **14** (0.05 g, 0.03 mmol) was dissolved in acetonitrile (10 mL) and the solution stirred for 48 h at 85 °C. After this period of time the solvent was evaporated under vacuo, petroleum ether added (15 mL) and the mixture stirred vigorously for 2 h, to separate a green solid. The solution obtained after filtration was concentrated and eluted through a column of silica gel (1:9 CH<sub>2</sub>Cl<sub>2</sub>:petroleum ether). The organic derivative was isolated as a colorless oil in almost quantitative yield. <sup>1</sup>H NMR (CDCl<sub>3</sub>, 25 °C): δ 6.52 (s, 1 H, H<sub>B</sub>), 6.44 (s, 1 H, H<sub>A</sub>), 3.80 (s, 2 H, C<sup>5</sup>H<sub>2</sub>), 2.53 (q, 2 H, <sup>3</sup>J<sub>HMe</sub> = 7.3 Hz, CH<sub>2</sub>Me), 2.39, 2.37, 2.36 (s, 3 H each, Me<sub>C</sub>, Me<sub>B</sub> and Me<sub>A</sub> resp.), 1.17 (t, 3 H, CH<sub>2</sub>Me). <sup>13</sup>C{<sup>1</sup>H} NMR (CDCl<sub>3</sub>, 25 °C): δ 138.9 (C<sup>7</sup>), 136.1 (C<sup>9</sup>), 135.7 (C<sup>1</sup>), 135.2 (C<sup>4</sup>), 134.3 (C<sup>6</sup>), 130.7 (C<sup>3</sup>), 127.1 (C<sup>2</sup>), 126.5 (C<sup>8</sup>), 26.3 (C<sup>5</sup>), 21.5 (CH<sub>2</sub>Me), 15.3 (Me<sub>A</sub>), 15.2 (Me<sub>B</sub>), 15.0 (CH<sub>2</sub>Me), 12.9 (Me<sub>C</sub>).
